# Supplementary material for: Active CREB1 Promotes a Malignant TGFβ2 Autocrine Loop in Glioblastoma
Source: Oxford University Press journal article supplement (doi:10.1158/2159-8290.cd-14-0275), 2014-08-01
Supplement: 21598290cd140275-sup-128575_2_supp_2582955_n919wj.docx [file 21598290cd140275-sup-128575_2_supp_2582955_n919wj.docx]

# This file contains figures related to the correlation of p-SMAD2 and p-CREB in GBM patients and the quantification of tumor growth in GBM PDX models expressing shCREB1.

# Supplementary figure legends

S1. **p-SMAD2 correlates with p-CREB1 expression in GBM patient tumors.** Graph showing the correlation between p-CREB1 and p-SMAD2 protein levels in tissue microarrays from patient GBM samples. Not all spots were evaluable in all stainings. A Spearmann’s test was used, and the correlation coefficient () and the two-tailed significance are shown. Representative images from the tissue microarrays are shown. Scale bar, 50 um.

S2. **Knock down of CREB1 decreases tumor growth in GBM PDX models**. IHC against human nestin was performed in 3 control and 6 shCREB1 tumors from Figure 7B (left). The stained tumor area was quantified and plotted. P < 0.05 using Student’s *t* test. Representative images are shown.
